# Supplementary material for: Pathways to Eating Disorders by Gender and Sexual Orientation: Objectification and Thinness Ideal
Source: Research Square preprint supplement (doi:10.21203/rs.3.rs-7622918/v1), 2025-09-30
Supplement: Supplementary file 1 [file bd977c1569f7b599cbf02e2a.docx]

**Supplementary materials**

| **Table S1**  *Estimates of de mediation SEM model* | | | | | | | | | |
| --- | --- | --- | --- | --- | --- | --- | --- | --- | --- |
| Outcome  Predictor | | | Estimate | SE | *Z* | *p* | Lower | Upper | Standardized |
| Women | | |  |  |  |  |  |  |  |
| Body dissatisfaction | | | |  |  |  |  |  |  |
|  |  | Int. thinness ideal | 0.630 | 0.091 | 69.181 | < .001 | 0.452 | 0.809 | .408 |
|  |  | Objectification | 0.313 | 0.058 | 53.711 | < .001 | 0.199 | 0.427 | .310 |
|  |  | BMI | 0.659 | 0.129 | 50.944 | < .001 | 0.406 | 0.913 | .258 |
| Drive for Thinness | | | |  |  |  |  |  |  |
|  |  | Int. thinness ideal | 0.836 | 0.073 | 114.41 | < .001 | 0.693 | 0.979 | .571 |
|  |  | Objectification | 0.280 | 0.047 | 59.89 | < .001 | 0.188 | 0.371 | .293 |
|  |  | BMI | 0.378 | 0.104 | 36.39 | < .001 | 0.174 | 0.581 | .156 |
| Bulimia | | | |  |  |  |  |  |  |
|  |  | Int. thinness ideal | 0.253 | 0.079 | 31.92 | .0014 | 0.098 | 0.408 | .237 |
|  |  | Objectification | 0.150 | 0.051 | 29.56 | .0031 | 0.051 | 0.249 | .215 |
|  |  | BMI | 0.357 | 0.113 | 31.71 | .0015 | 0.136 | 0.578 | .202 |
| Internalization of thinness ideal | | | |  |  |  |  |  |  |
|  |  | Gender role | -0.105 | 25.48 | -0.041 | .9671 | -50.99 | 48.89 | -.003 |
|  |  | Attraction to men | 0.357 | 0.135 | 26.39 | .0083 | 0.092 | 0.622 | .183 |
|  |  | BMI | 0.385 | 0.115 | 33.65 | < .001 | 0.161 | 0.610 | .233 |
| Objectification | | |  |  |  |  |  |  |  |
|  |  | Gender role | 101.89 | 39.84 | 25.58 | .0105 | 23.81 | 179.97 | .180 |
|  |  | Attraction to men | 0.074 | 0.211 | 0.348 | .7275 | -0.340 | 0.488 | .025 |
|  |  | BMI | 0.051 | 0.179 | 0.284 | .7761 | -0.300 | 0.402 | .020 |
| Men | |  |  |  |  |  |  |  |  |
| Body dissatisfaction | | | |  |  |  |  |  |  |
|  |  | Int. thinness ideal | 0.295 | 0.144 | 20.45 | .0408 | 0.012 | 0.578 | .207 |
|  |  | Objectification | 0.310 | 0.083 | 37.42 | < .001 | 0.148 | 0.472 | .372 |
|  |  | BMI | 10.16 | 0.185 | 54.99 | < .001 | 0.654 | 13.78 | .385 |
| Drive for thinness | | | | |  |  |  |  |  |
|  |  | Int. thinness ideal | 0.492 | 0.108 | 45.49 | < .001 | 0.280 | 0.704 | .395 |
|  |  | Objectification | 0.221 | 0.062 | 35.54 | < .001 | 0.099 | 0.342 | .304 |
|  |  | BMI | 0.846 | 0.138 | 61.08 | < .001 | 0.574 | 11.17 | .368 |
| Bulimia | | | | |  |  |  |  |  |
|  |  | Int. thinness ideal | 0.227 | 0.090 | 25.24 | .0116 | 0.051 | 0.404 | .287 |
|  |  | Objectification | 0.027 | 0.052 | 0.519 | .6036 | -0.075 | 0.128 | .058 |
|  |  | BMI | 0.616 | 0.115 | 53.41 | < .001 | 0.390 | 0.842 | .422 |
| Internalization of thinness Ideal | | | | |  |  |  |  |  |
|  |  | Gender role | 0.114 | 33.84 | 0.034 | .9730 | -65.18 | 67.47 | .003 |
|  |  | Attraction to men | 0.304 | 0.114 | 26.67 | .0076 | 0.081 | 0.528 | .243 |
|  |  | BMI | 0.308 | 0.167 | 18.50 | .0643 | -0.018 | 0.635 | .167 |
| Objectification | | | | |  |  |  |  |  |
|  |  | Gender role | -10.67 | 58.19 | -0.183 | .8545 | -124.73 | 103.38 | -.017 |
|  |  | Attraction to men | 0.635 | 0.196 | 32.39 | .0012 | 0.251 | 10.19 | .296 |
|  |  | BMI | 0.024 | 0.287 | 0.084 | .9335 | -0.538 | 0.586 | .008 |

| **Table S2**  *Residual covariances estimates of de mediation SEM model* | | | | | | | | | | | | | | |
| --- | --- | --- | --- | --- | --- | --- | --- | --- | --- | --- | --- | --- | --- | --- |
|  |  | Estimate | SE | | *Z* | | *p* | | Lower | | Upper | | Standardized | | |
| Women | | | | | | | | | | | | | | |
|  | Int. thinness ideal - Objectification | 21.907 | | 3.313 | | 6.612 | | <.001 | | 15.413 | | 28.400 | | .526 | | |
|  | Body dissatisfaction - Drive for thinness | 7.779 | | 1.989 | | 3.911 | | < .001 | | 3.880 | | 11.678 | | .286 | | |
|  | Body dissatisfaction - Bulimia | 8.721 | | 2.163 | | 4.031 | | < .001 | | 4.481 | | 12.961 | | .296 | | |
|  | Drive for thinness - Bulimia | 6.069 | | 1.718 | | 3.532 | | < .001 | | 2.701 | | 9.436 | | .257 | | |
| Men | | | | | | | | | | | | | | |
|  | Int. thinness ideal - Objectification | 29.831 | 4.830 | | 6.177 | | < .001 | | 20.365 | | 14.638 | | .709 | | |
|  | Body dissatisfaction - Drive for thinness | 10.238 | 2.245 | | 4.561 | | < .001 | | 5.839 | | 5.911 | | .472 | | |
|  | Body dissatisfaction - Bulimia | 7.324 | 1.825 | | 4.013 | | < .001 | | 3.747 | | 10.901 | | .406 | | |
|  | Drive for thinness - Bulimia | 3.351 | 1.306 | | 2.566 | | .010 | | 0.791 | | 5.911 | | .248 | | |

| **Table S3**  *Correlations Between Eating Disorder Symptomatology and Associated Variables for women (below the diagonal n = 202) and men (above the diagonal, n =114).* | | | | | | | | | | | | |
| --- | --- | --- | --- | --- | --- | --- | --- | --- | --- | --- | --- | --- |
|  | Attraction to men | Gender role | Objectification | Internalization of thinness ideal | Body dissatisfaction | Drive for thinness | Bulimia | Athletic ideal internalization | Family pressure | Peer pressure | Media pressure |
| Attraction to men | — | .1998 | .2928 | .2481 | .2260 | .2847 | .1382 | -.1659 | .1130 | .0284 | .4087 |
| Gender role | .1357 | — | .0433 | .0757 | .2292 | .1234 | .2622 | -.2265 | .1442 | .0454 | .1501 |
| Objectification | .0460 | .1860 | — | .7204 | .5261 | .5931 | .2704 | .3612 | .2770 | .3137 | .4118 |
| Internalization of thinness ideal | .1468 | .0495 | .5133 | — | .5418 | .6778 | .4023 | .4714 | .2873 | .3345 | .4388 |
| Body dissatisfaction | -.0220 | .1669 | .5289 | .6195 | — | .7450 | .6069 | .1081 | .5340 | .5342 | .4895 |
| Drive for thinness | .0749 | .1245 | .5915 | .7528 | .6827 | — | .5413 | .2908 | .3621 | .4766 | .5040 |
| Bulimia | .0608 | .0993 | .3442 | .3886 | .5153 | .4976 | — | .1167 | .3982 | .3420 | .3109 |
| Athletic ideal internalization | -.0732 | -.1809 | .1185 | .3704 | .1830 | .2910 | .1607 | — | -.0024 | .1254 | .0518 |
| Family pressure | -.0677 | .1577 | .1704 | .2325 | .4037 | .3387 | .3757 | .0549 | — | .6383 | .3094 |
| Peer pressure | -.0099 | .0311 | .0997 | .1473 | .3186 | .1686 | .2027 | .0952 | .4407 | — | .3859 |
| Media pressure | -.1146 | .0634 | .3377 | .4618 | .4743 | .4110 | .2541 | .1559 | .3027 | .3134 | — |
| *Note: Based on the sample size and a significance threshold of p < .05 (two-tailed), correlations exceeding r = .14 for women and r = .18 for men reach statistical significance.* | | | | | | | | | | | | |
